# Supplementary material
Source: Springer Nature journal article supplement (https://www.springermedizin.de/resource/supplementary/13023_2011_363_MOESM5_ESM.pdf/9642190)

**Clinical diagnosis of NBS**

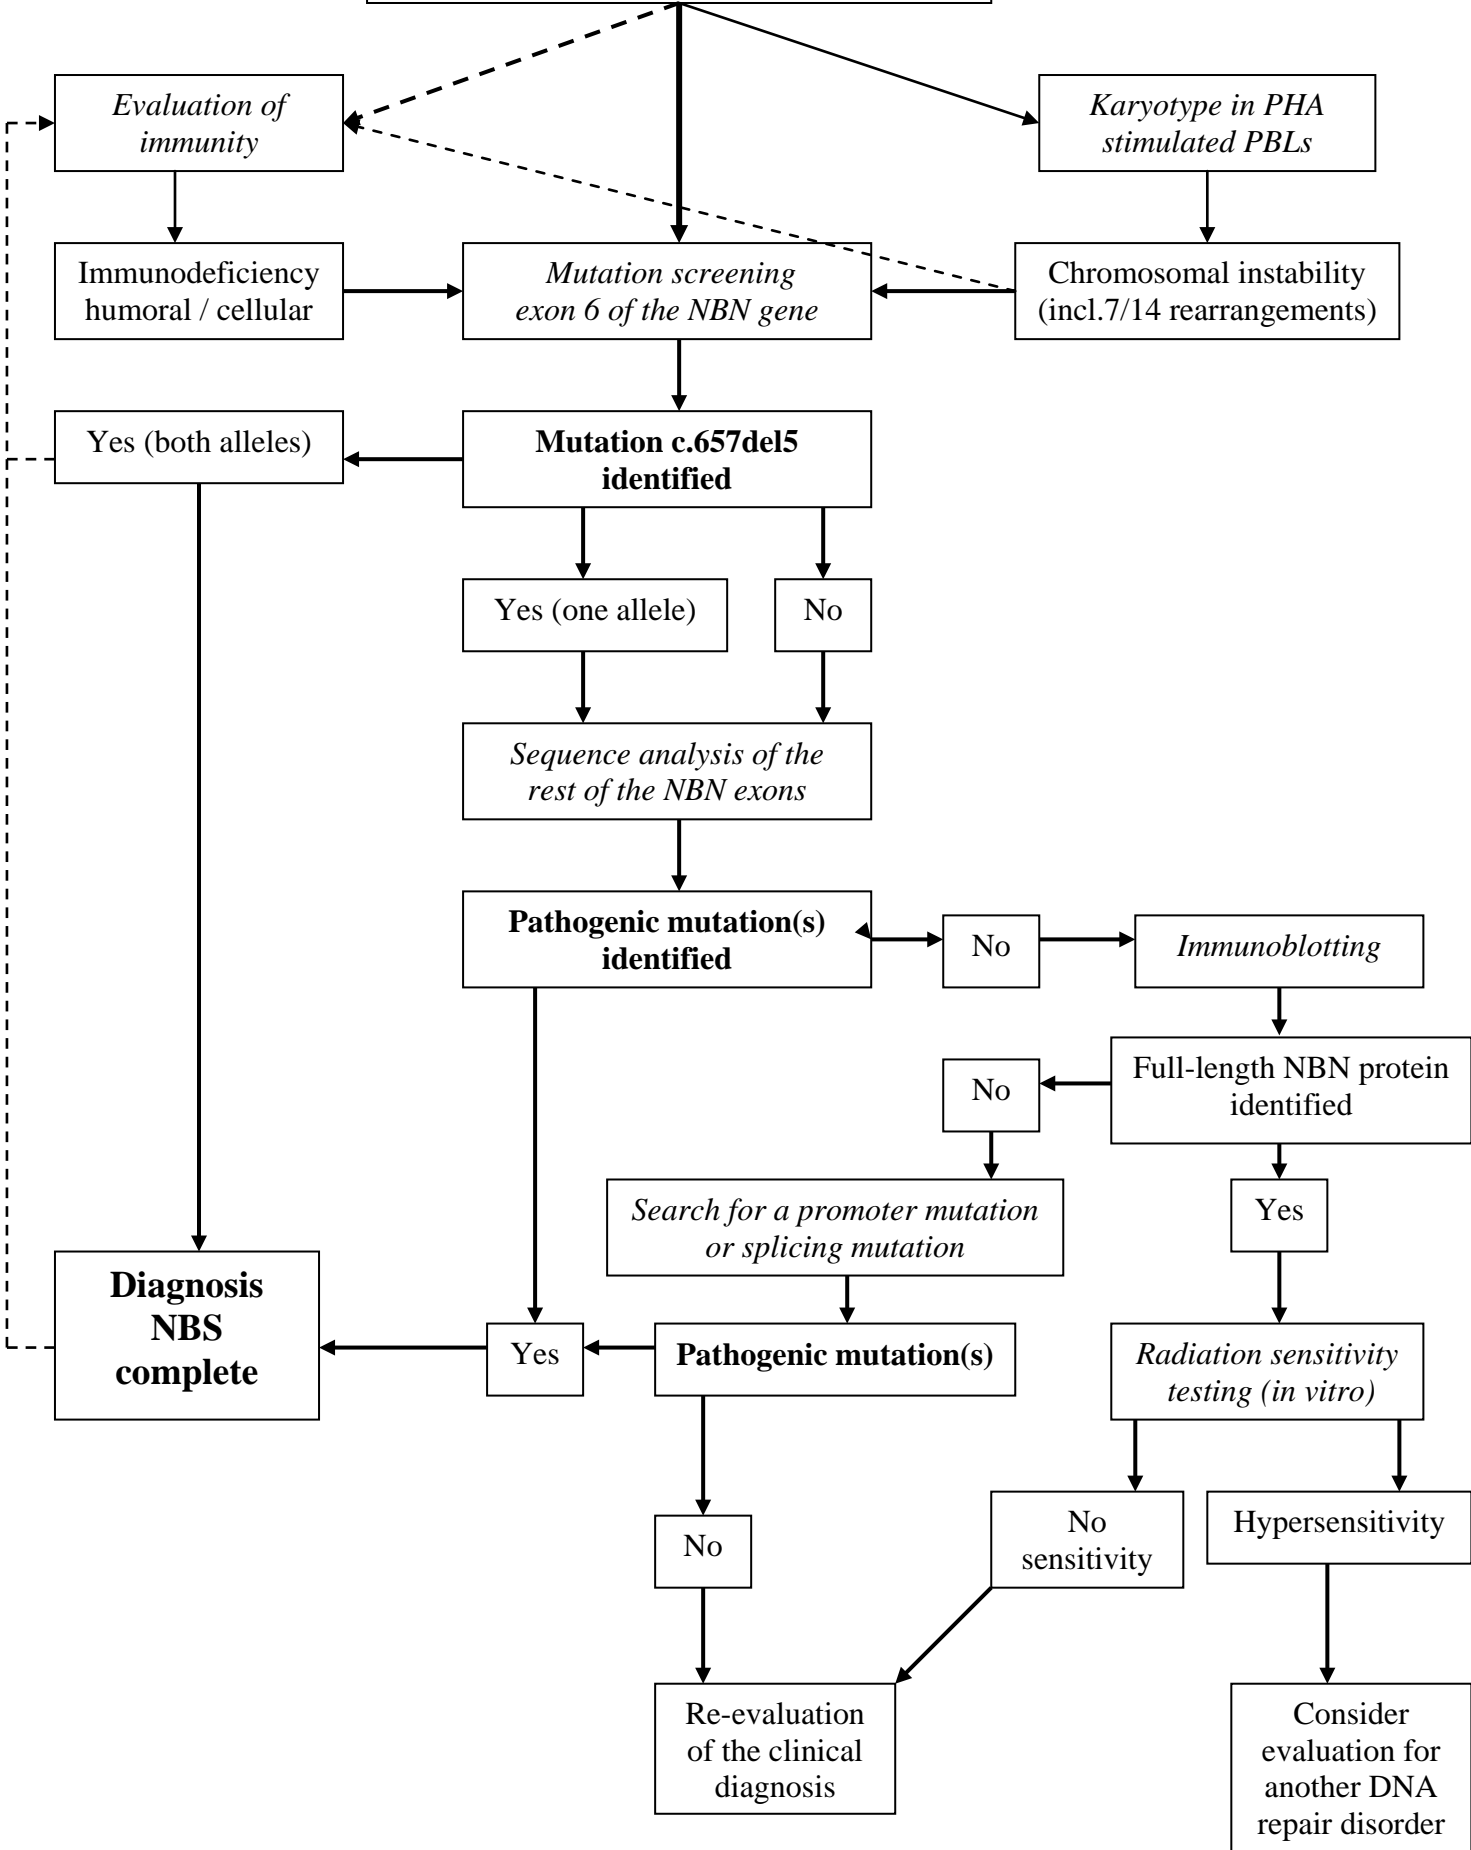

Supplement: MOESM5 [file 9642190]
